# Supplementary material for: Understanding the Impact of Childhood Sexual Abuse on Men’s Risk Behavior: Protocol for a Mixed-Methods Study
Source: PubMed Central journal article supplement (PMC5847822; doi:10.2196/resprot.9071), 2018-02-26
Supplement: resprot_v7i2e62_app2.pdf [file resprot_v7i2e62_app2.pdf]

| Construct                                                                                                                                                                                                                                                                            | Social identity and group membership                                                                                                         | Assessment (M, IG)*       |
|--------------------------------------------------------------------------------------------------------------------------------------------------------------------------------------------------------------------------------------------------------------------------------------|----------------------------------------------------------------------------------------------------------------------------------------------|---------------------------|
| Gender                                                                                                                                                                                                                                                                               | Gender identity and expression<br>Identification with cultural masculine norms                                                               | M1a - M1b<br>M13, IG7     |
| Sexual orientation                                                                                                                                                                                                                                                                   | Self-identification (How do you see yourself?)<br>Sexual attraction, behavior, and fantasies<br>Emotional, social, and lifestyle preferences | M2, IG4, IG8              |
| Race and ethnicity                                                                                                                                                                                                                                                                   | Racial / ethnic identity, cultural estrangement                                                                                              | M1d - M1e, M12, IG6       |
| <b>Factors hypothesized to be influenced by the intersection of social identities:</b>                                                                                                                                                                                               |                                                                                                                                              |                           |
| <ul style="list-style-type: none"> <li>• Appraisal and interpretation of childhood sexual experiences</li> </ul>                                                                                                                                                                     |                                                                                                                                              | M6a – M6d, IG1 – IG3, IG5 |
| <ul style="list-style-type: none"> <li>• Disclosure and concealment of same-sex behavior</li> </ul>                                                                                                                                                                                  |                                                                                                                                              | M4, IG7                   |
| <ul style="list-style-type: none"> <li>• Psychological distress and emotional functioning</li> </ul>                                                                                                                                                                                 |                                                                                                                                              | M9 – M11, IG9             |
| <ul style="list-style-type: none"> <li>• Current and past substance use</li> </ul>                                                                                                                                                                                                   |                                                                                                                                              | M7 – M8, IG9, IG10        |
| <ul style="list-style-type: none"> <li>• Access to substance abuse treatment or other health services</li> </ul>                                                                                                                                                                     |                                                                                                                                              | IG11 – IG13               |
| <p>*Note: The figure indicates quantitative measures (M) and interview guide topics (IG) that will be used to examine each of the social identities and factors hypothesized to be influenced by the intersection of these identities. See Tables 2 and 3 for specific M and IG.</p> |                                                                                                                                              |                           |
